# Supplementary material
Source: MDPI journal article supplement (https://www.mdpi.com/2313-0105/7/2/40)
Supplement: s1 [file s1]

# Comparison of Aqueous and Non-Aqueous Binder Materials and the Mixing Ratios for Zn-MnO<sub>2</sub> Batteries with Mildly Acidic Aqueous Electrolytes

Oliver Fitz<sup>1\*</sup>, Stefan Ingenhoven<sup>1</sup>, Christian Bischoff<sup>1</sup>, Harald Gentischer<sup>1</sup>, Kai Peter Birke<sup>2</sup>, Dragos Saracsan<sup>3</sup> and Daniel Biro<sup>4</sup>

## S1. Brief literature research on binder materials, solvents, electrode composition ratios and current collectors

Table S1: Brief literature research on binder materials, solvents, mixing ratios and current collectors. This literature search was carried out as an example and does not claim to be complete.

| source | electrode production process | binder polymer (BP) (solvent)                                 | composition AM-CB-BP  | comment <sup>1</sup>                                                                            | electrochemical performance                      |
|--------|------------------------------|---------------------------------------------------------------|-----------------------|-------------------------------------------------------------------------------------------------|--------------------------------------------------|
| [1]    | doctor blade coating         | PVDF (NMP), CMC (water), Na-alginate (water), CMC (water)+PVA | 70-20-10              | current collector: Titanium                                                                     | 280 mAh.g <sup>-1</sup> @ 100 mA.g <sup>-1</sup> |
| [2]    | doctor blade coating         | PVDF(NMP)                                                     | 70-20-10              | current collector: Steel mesh                                                                   | - / investigations on negative anode             |
| [3]    | doctor blade coating         | PVDF(NMP)                                                     | 60-30-10              | current collector: Carbon Paper<br>Electrolyte: Zn(TFSI) <sub>2</sub> + MnSO <sub>4</sub> (aq.) | 212 mAh @ "5C"                                   |
| [4]    | doctor blade coating         | PVDF(NMP)                                                     | 75-15-10              | current collector: Steel mesh                                                                   | 218 mAh.g <sup>-1</sup> @ 123 mA.g <sup>-1</sup> |
| [5]    | pasting/smearing             | PVDF (Solvent not specified)                                  | 80-10-10              | current collector: Ti mesh                                                                      | 270 mAh.g <sup>-1</sup> @ 30 mA.g <sup>-1</sup>  |
| [6]    | doctor blade coating         | PVDF (Solvent not specified)                                  | 70-20-10              | current collector: Titanium                                                                     | 270 mAh.g <sup>-1</sup> @ "1C"                   |
| [7]    | doctor blade coating         | LA133 (water)+ CMC (water) (8:2)                              | 70-20-8(LA133)-2(CMC) | active material: MnO <sub>2</sub> /CNT nanocomposite,                                           | 665 mAh.g <sup>-1</sup> @ 100 mA.g <sup>-1</sup> |

<sup>1</sup> Electrolytes contain ZnSO<sub>4</sub> or MnSO<sub>4</sub>, if not stated otherwise.

|      |                          |                            |                                                 |                                                                                                              |                                                       |
|------|--------------------------|----------------------------|-------------------------------------------------|--------------------------------------------------------------------------------------------------------------|-------------------------------------------------------|
|      |                          |                            |                                                 | current collector:<br>Steel foil                                                                             |                                                       |
| [8]  | doctor blade<br>coating  | LA133 (water)              | 70-20-10                                        | current collector:<br>Steel foil                                                                             | 80 mAh.g <sup>-1</sup> @<br>100 mA.g <sup>-1</sup>    |
| [9]  | doctor blade<br>coating  | PVDF (NMP)                 | 80-11(2%<br>Graphite, 9%<br>carbon Black)-<br>9 | current collector:<br>Carbon Paper                                                                           | 233 mAh.g <sup>-1</sup> @<br>30 mA.g <sup>-1</sup>    |
| [10] | doctor blade<br>coating  | PVDF (NMP)                 | 85-10-5                                         | current collector:<br>Steel foil;<br>Electrolyte:<br>Zn(CF <sub>3</sub> SO <sub>3</sub> ) <sub>2</sub> (aq.) | 230 mAh.g <sup>-1</sup> @<br>200 mA.g <sup>-1</sup>   |
| [11] | doctor blade<br>coating  | LA133 (water)              | 70-20-10                                        | current collector:<br>Steel foil                                                                             | 139 mAh.g <sup>-1</sup> @<br>100 mA.g <sup>-1</sup>   |
| [12] | doctor blade<br>coating  | PVDF (NMP)                 | 70-20-10                                        | current collector:<br>Carbon sheets                                                                          | 300 mAh.g <sup>-1</sup> @<br>103 mA.g <sup>-1</sup>   |
| [13] | doctor blade<br>coating  | CMC (water)/SBR<br>(water) | 80-10-10                                        | MnO <sub>2</sub> -nanorods                                                                                   | 312 mAh.g <sup>-1</sup> @<br>33 mA.g <sup>-1</sup>    |
| [14] | pasting                  | PTFE                       | 60-30-10                                        | Pressed Paste<br>current collector:<br>Steel Gauze<br>Circle                                                 | 103 mAh.g <sup>-1</sup> @<br>300 mA.g <sup>-1</sup>   |
| [15] | doctor blade<br>coating  | PTFE                       | 80-10-10                                        | active material:<br>PANI intercalated<br>MnO <sub>2</sub><br>current collector:<br>Ti-grid                   | 280 mAh.g <sup>-1</sup> @<br>200 mA.g <sup>-1</sup>   |
| [16] | electrodeposition<br>EMD | -                          | -                                               | carbon cloth                                                                                                 | Different<br>denotation used                          |
| [17] | pasting                  | PVDF                       | 70-20-10                                        | stainless steel<br>wire mesh                                                                                 | 300 mAh.g <sup>-1</sup> @<br>100 mA.g <sup>-1</sup>   |
| [18] | electrodeposition<br>EMD | -                          | -                                               | carbon fibre<br>paper                                                                                        | 290 mAh.g <sup>-1</sup> @<br>90 mA.g <sup>-1</sup>    |
| [19] | doctor blade<br>coating  | PVDF (NMP)                 | 70-20-10                                        | Stainless steel foil<br>(30 µm), first<br>application of<br>conductive<br>CB+BP layer                        | 187 mAh.g <sup>-1</sup> @<br>100 mA.g <sup>-1</sup>   |
| [20] | doctor blade<br>coating  | PVDF (NMP)                 | 70-10-20                                        | Stainless steel foil<br>(25 µm)                                                                              | 200 mAh.g <sup>-1</sup> @<br>42 mA.g <sup>-1</sup>    |
| [21] | doctor blade<br>coating  | PVDF (NMP)                 | 70-10-20                                        | Stainless steel foil<br>(25 µm)                                                                              | 167 mAh.g <sup>-1</sup> @ 42<br>mA.g <sup>-1</sup>    |
| [22] | tableting                | PTFE                       | 70-20-10                                        | Active material:<br>α-MnO <sub>2</sub><br>Nanowires                                                          | 362,6 mAh.g <sup>-1</sup> @<br>300 mA.g <sup>-1</sup> |

|      |                      |            |          |                                                                                               |                                                   |
|------|----------------------|------------|----------|-----------------------------------------------------------------------------------------------|---------------------------------------------------|
|      |                      |            |          | No current collector                                                                          |                                                   |
| [23] | Pressing             | TAB        | 70-20-10 | Stainless steel mesh                                                                          | 250 mAh.g <sup>-1</sup> @ 0.5 mA.cm <sup>-2</sup> |
| [24] | Pressing             | TAB        | 70-20-10 | Stainless steel mesh                                                                          | 252 mAh.g <sup>-1</sup> @ 83 mA.g <sup>-1</sup>   |
| [25] | doctor blade coating | PVDF (NMP) | 80-10-10 | Carbon coated aluminium foil<br>Electrolyte:<br>0,5 Zn(TFSI) <sub>2</sub><br>in Acrylonitrile | 110 mAh.g <sup>-1</sup> @ 12.3 mA.g <sup>-1</sup> |

## S2. Experimental cell setup using EL Cell® ECC aqu

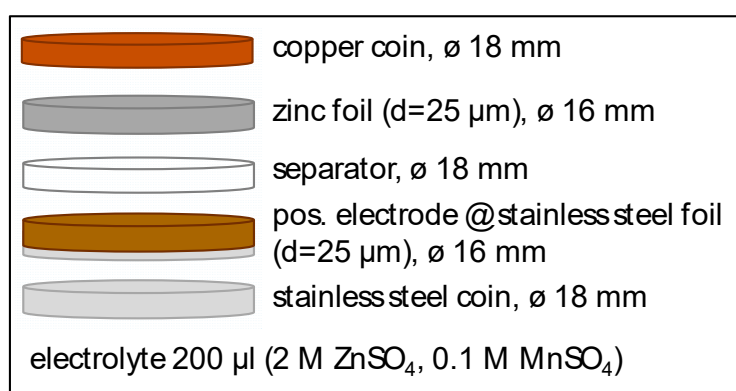

Figure S1: Overview of the experimental cell setup inside the EL-Cell® ECC aqu.

### S3. Rate Capability Test (RCT): Test plan procedure

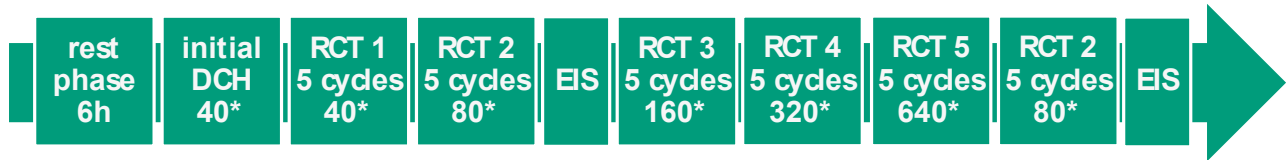

Figure S2: Graphical overview of the test plan procedure for the rate capability test of the herein tested cells.

Table S2: Detailed Overview of the test plan procedure for the RCT.

| Cycle   |                     | Mass specific current rate<br>$i_{\text{cycling}} / \text{mA.g}_{\text{AM}}^{-1}$ | Number of loops | Comment                                                                            |
|---------|---------------------|-----------------------------------------------------------------------------------|-----------------|------------------------------------------------------------------------------------|
|         | Rest                |                                                                                   | -               | 6 hours                                                                            |
| 1       | Discharge           | 40                                                                                | -               | Initial discharge                                                                  |
| 2 – 6   | Charge<br>Discharge | 40                                                                                | 5               |                                                                                    |
| 7 – 11  | Charge<br>Discharge | 80                                                                                | 5               |                                                                                    |
|         | PEIS                |                                                                                   |                 | PEIS-measurements at 1.7 V, 1.25 V and 0.8 V; 2 hours rest before each measurement |
| 12 – 16 | Charge<br>Discharge | 160                                                                               | 5               |                                                                                    |
| 17 – 21 | Charge<br>Discharge | 320                                                                               | 5               |                                                                                    |
| 22 – 26 | Charge<br>Discharge | 640                                                                               | 5               |                                                                                    |
| 27 – 31 | Charge<br>Discharge | 80                                                                                | 5               |                                                                                    |
|         | PEIS                |                                                                                   |                 | PEIS-measurements at 1.7 V, 1.25 V and 0.8 V; 2 hours rest before each measurement |

#### S4. Mechanical Stress Test (MST): Experimental setup

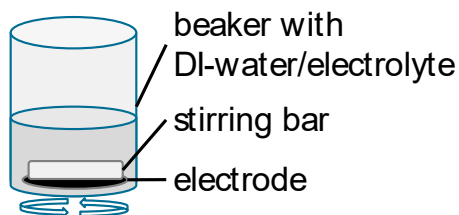

Figure S3: Experimental setup of the mechanical stress test with a magnetic stirring bar in a PP beaker (20 ml,  $\varnothing 31 \times 48$  mm) filled with  $\sim 10$  ml of liquid.

#### S5. Derivation: overpotentials by increasing ohmic resistance in energy plot

$$E = C * U \quad (1)$$

$$U = R * I \quad (2)$$

$$E = C * R * I \quad (3)$$

with  $I = \text{const.}$  (determined by constant current cycling rate of CC-step)

Here, E means energy, C means electric charge (capacity), U means voltage, R means ohmic resistance, I means current.

#### S6. Binder variation: PVP results

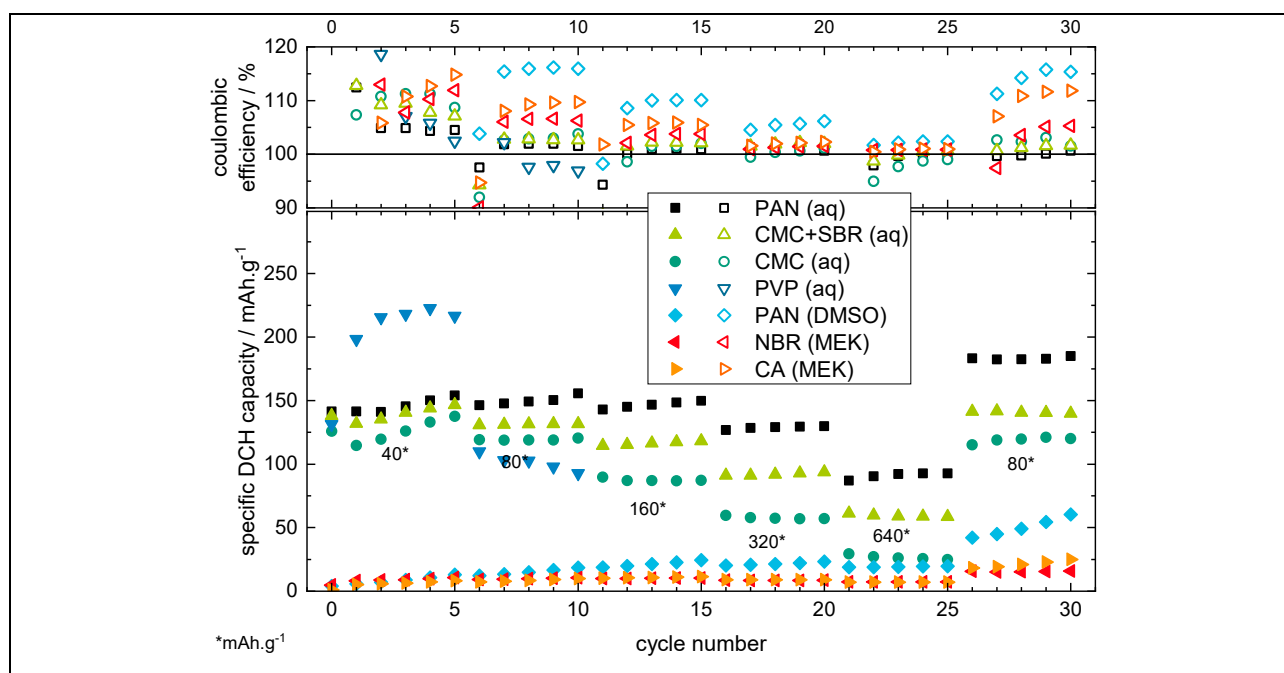

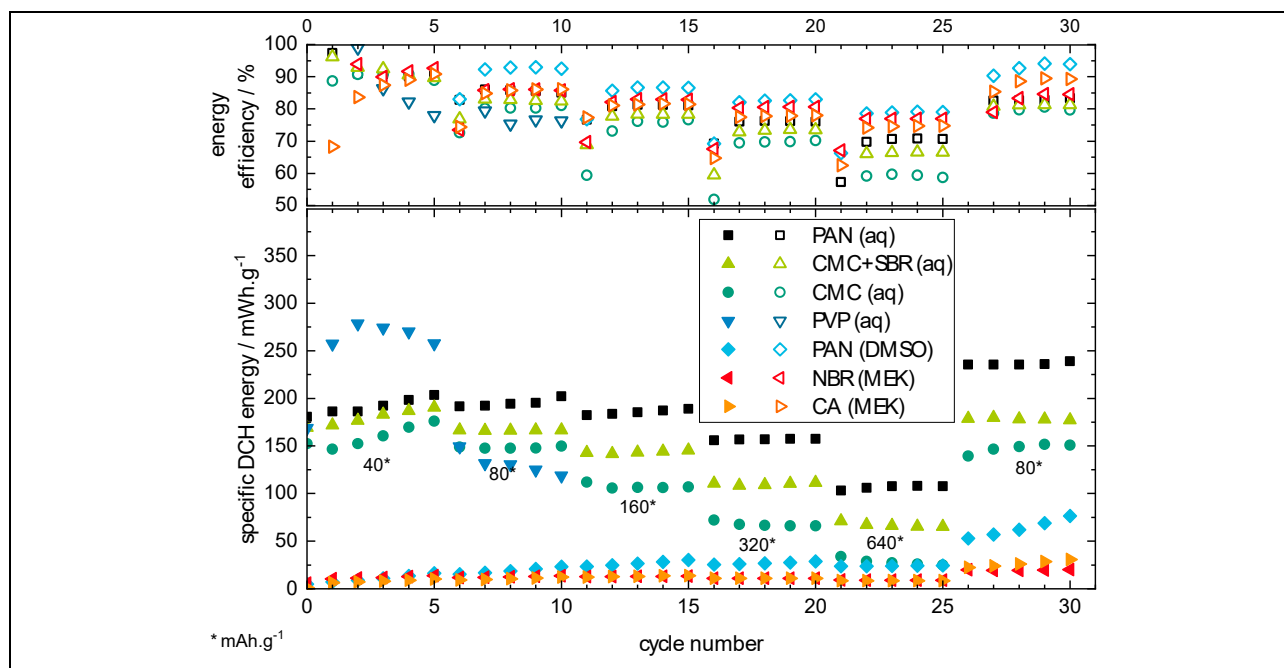

Figure S4: RCT results including the PVP (aq) binder polymer, which is not finishing the RCT due to stability issues of the electrode coating (s. MST).

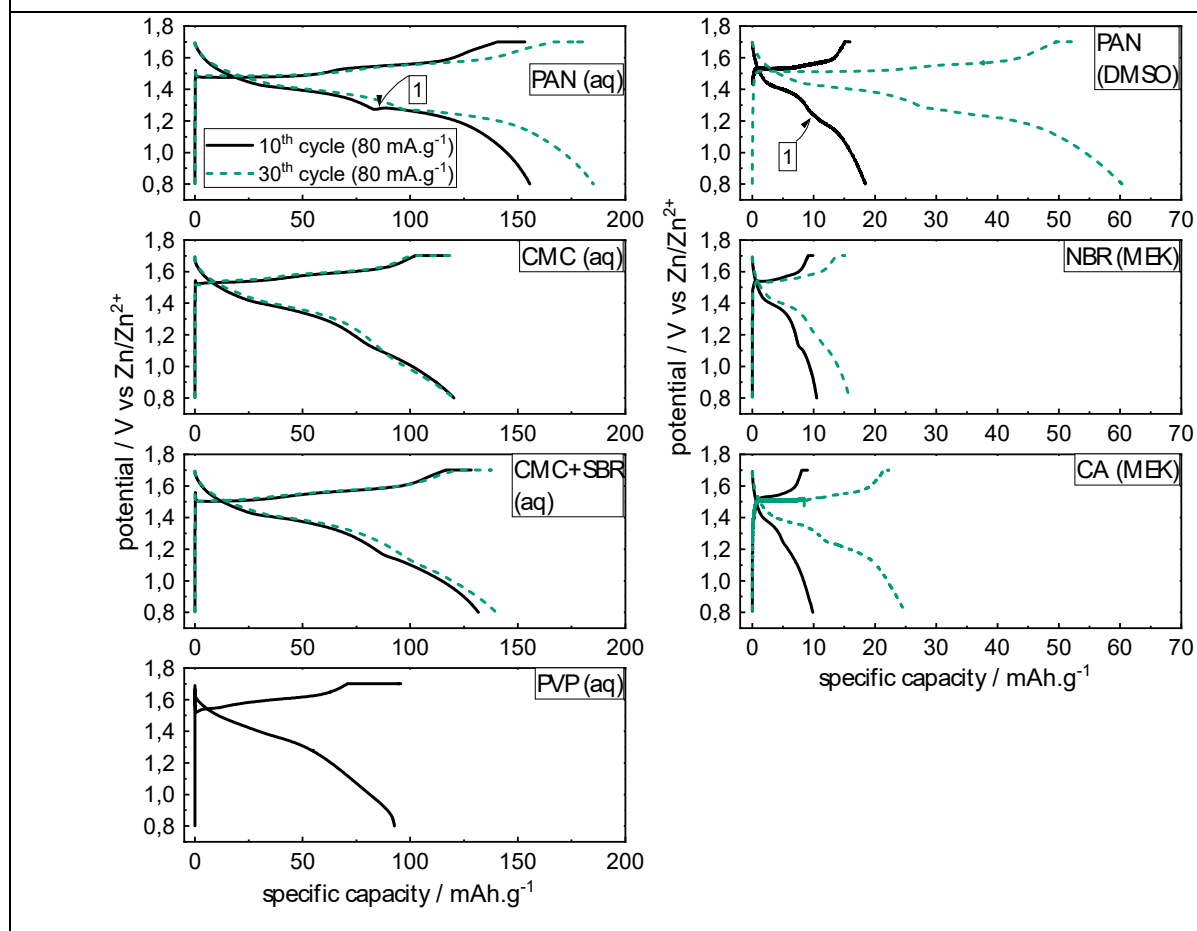

Figure S5: Potential curves including the PVP binder, which was not able to finish the RCT.

S7. SEM+EDX: PAN (aq) vs. PAN (DMSO), pristine vs post mortem state

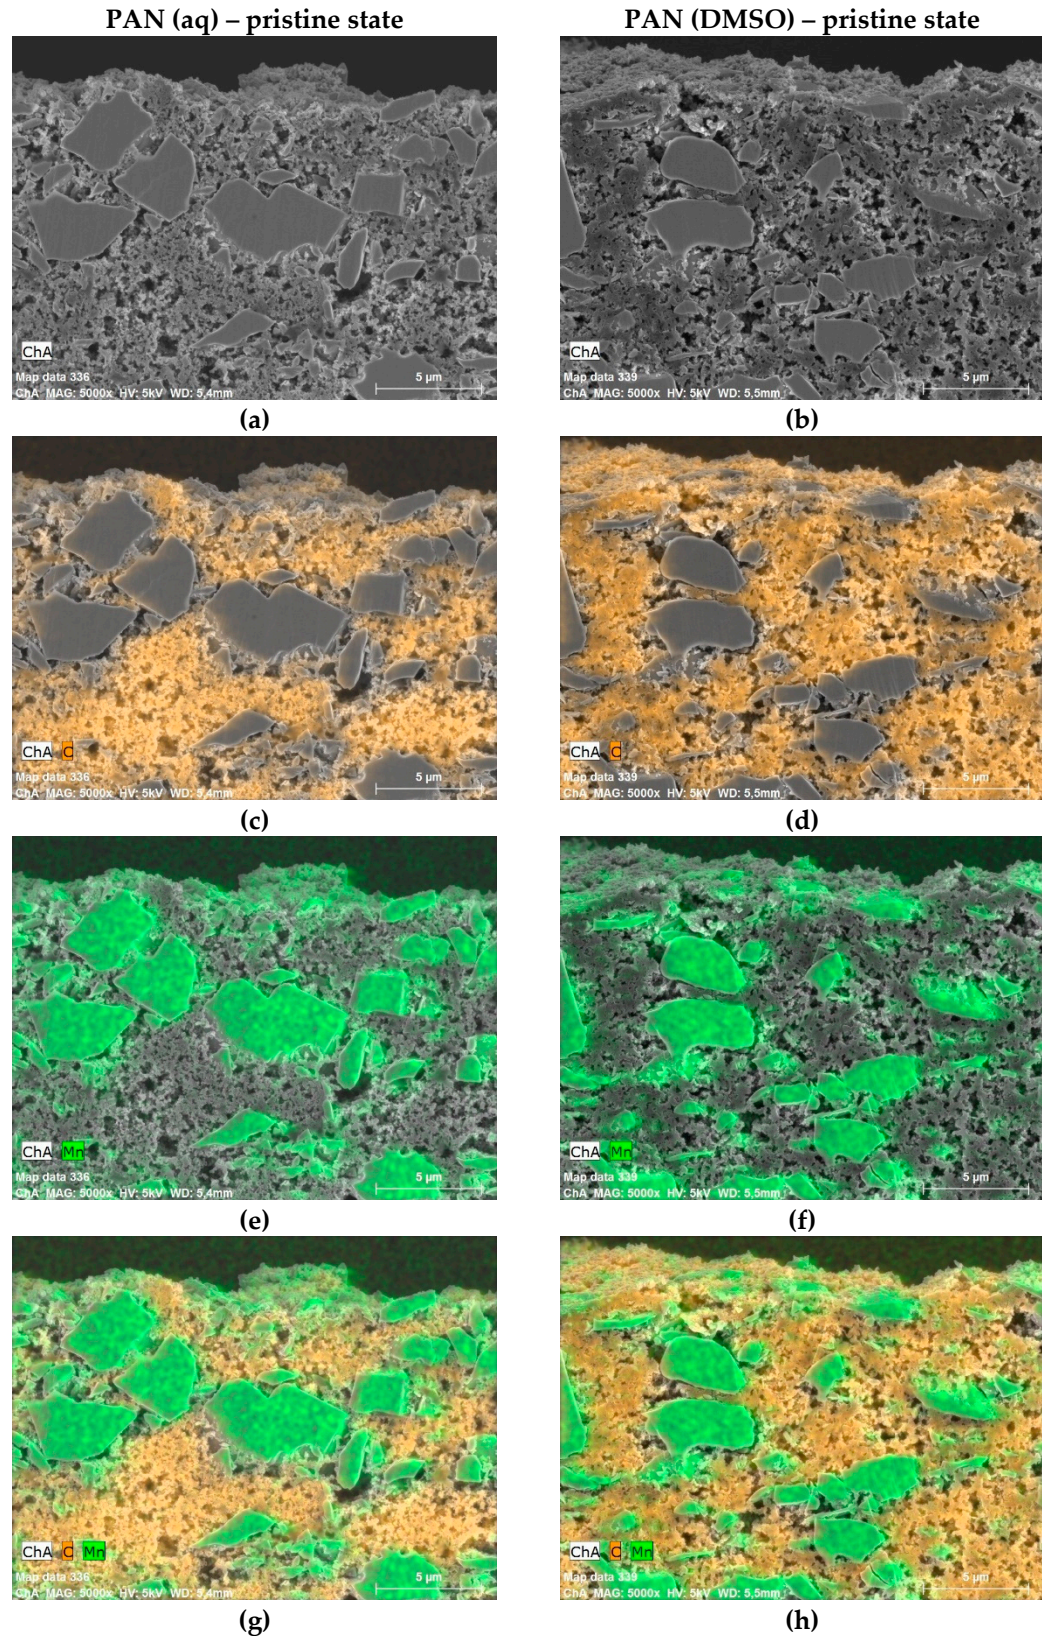

Figure S6: Comparison of the PAN (aq) and the PAN (DMSO) coating in pristine state.  $\text{MnO}_2$  particles are coloured green, carbon black is coloured orange.

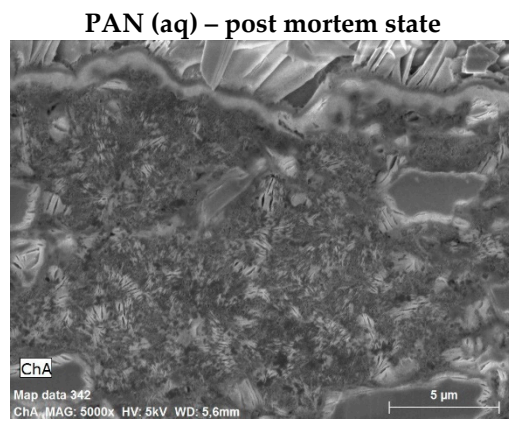

(a)

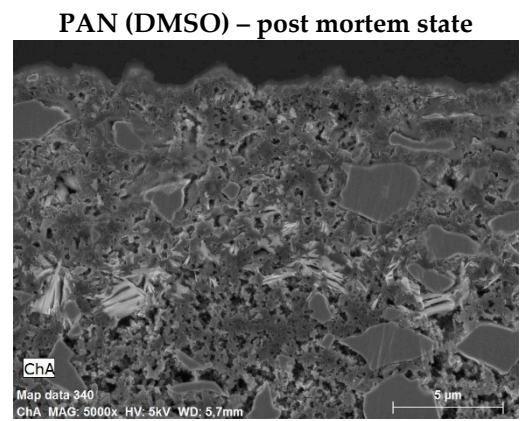

(b)

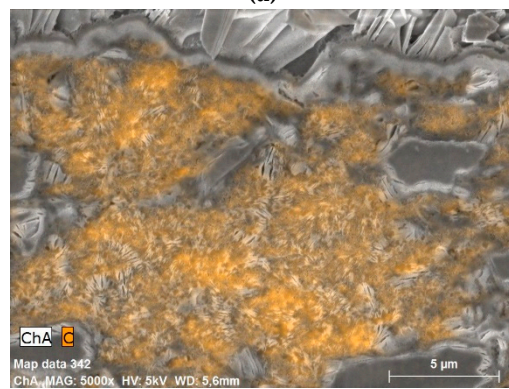

(c)

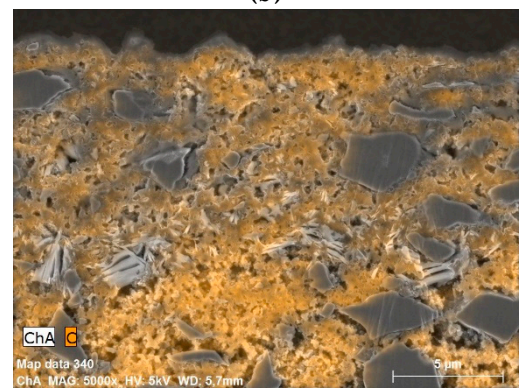

(d)

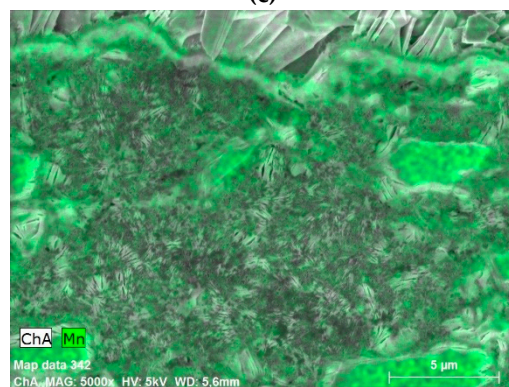

(e)

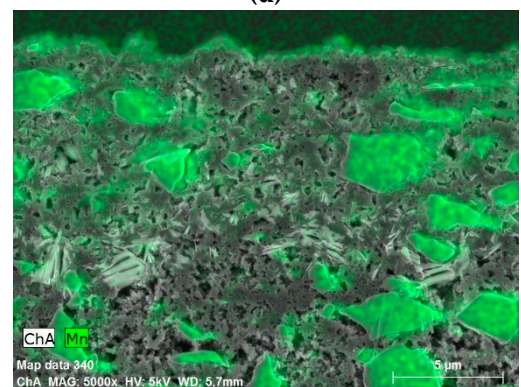

(f)

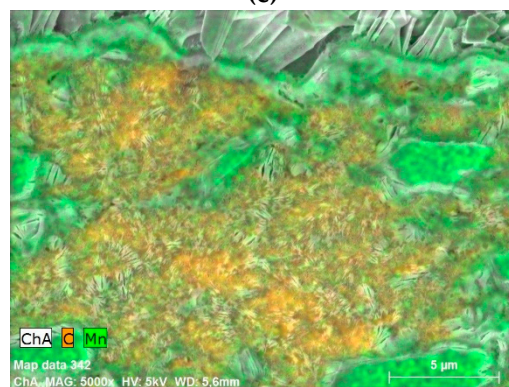

(g)

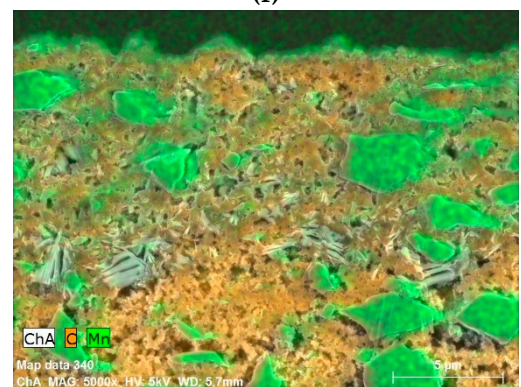

(h)

Figure S7: Comparison of the PAN (aq) and the PAN (DMSO) coating in post mortem state.  $\text{MnO}_2$  particles are coloured green, carbon black is coloured orange.

## S8. Binder variation: EIS results

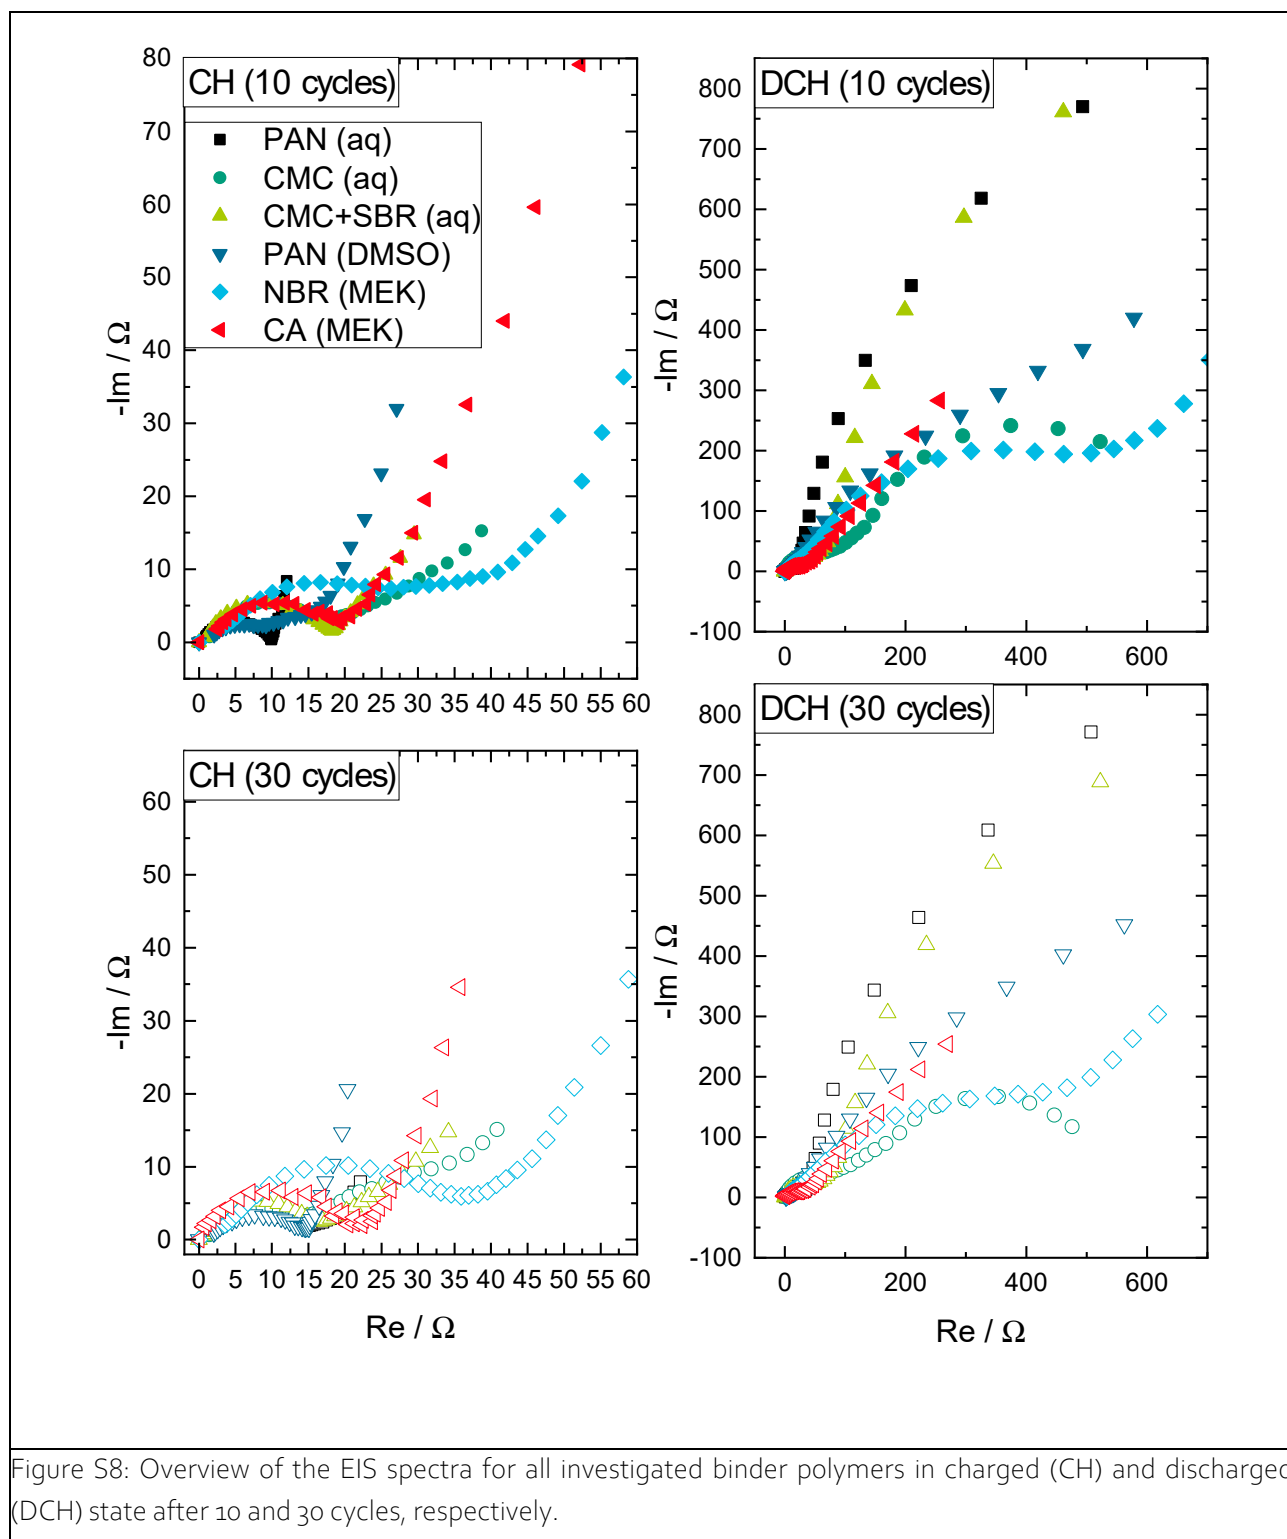

Figure S8: Overview of the EIS spectra for all investigated binder polymers in charged (CH) and discharged (DCH) state after 10 and 30 cycles, respectively.

## S9. Mixing ratio comparison: efficiency details

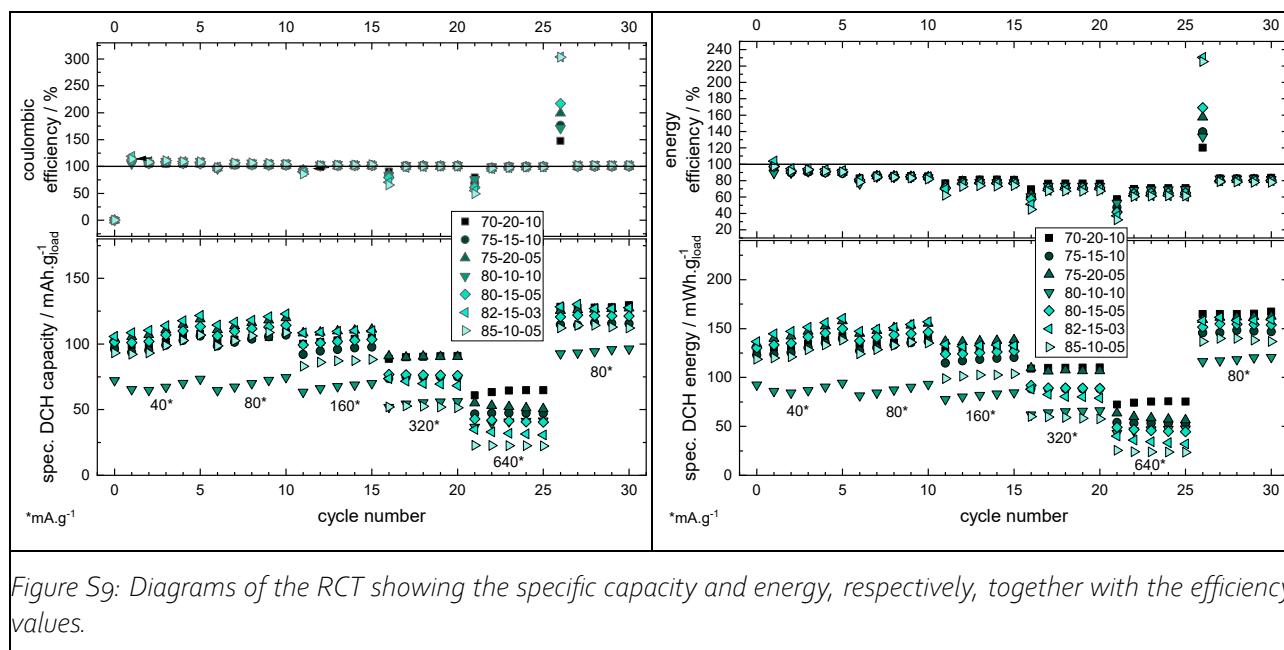

Figure S9: Diagrams of the RCT showing the specific capacity and energy, respectively, together with the efficiency values.

Compared to the presentation of the results in the paper, the y-axis of the efficiency values shows all the efficiency results of the cells, respectively, including the deviating values after a change of the current rate. This deviation can be related to a reduced discharge capacity during the first discharge step of each of the current rates (increasing overpotential for increasing current rate) in comparison to the related charge step, in consequence of the major influence of MnO<sub>2</sub> deposition/dissolution mechanism in ARZIBs. Noticeably, this behaviour happens vice versa for the last current rate change from 640 to 80 mA.h.g<sup>-1</sup>, due to an additional discharge capacity in consequence of a reduction of the overpotential for decreasing current rates.

# S10. SEM+EDX for selected coatings

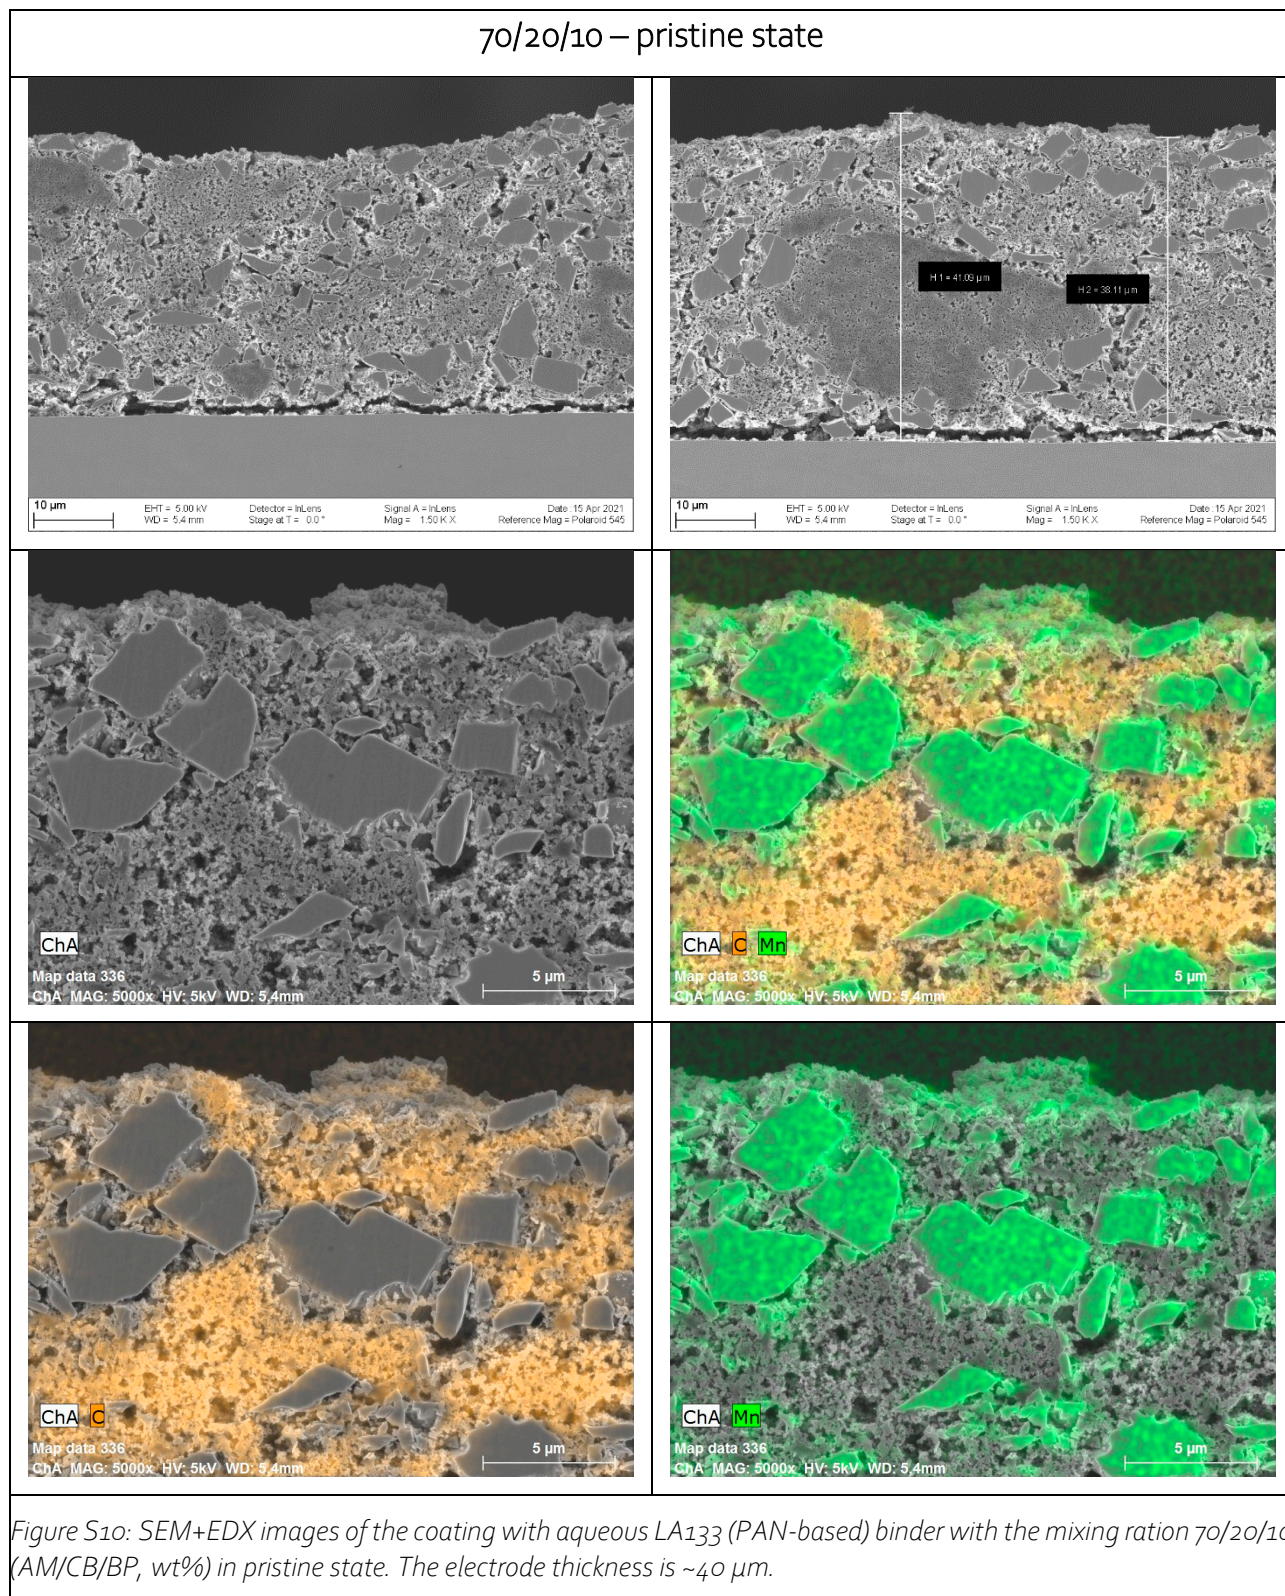

# 80/15/05 – pristine state

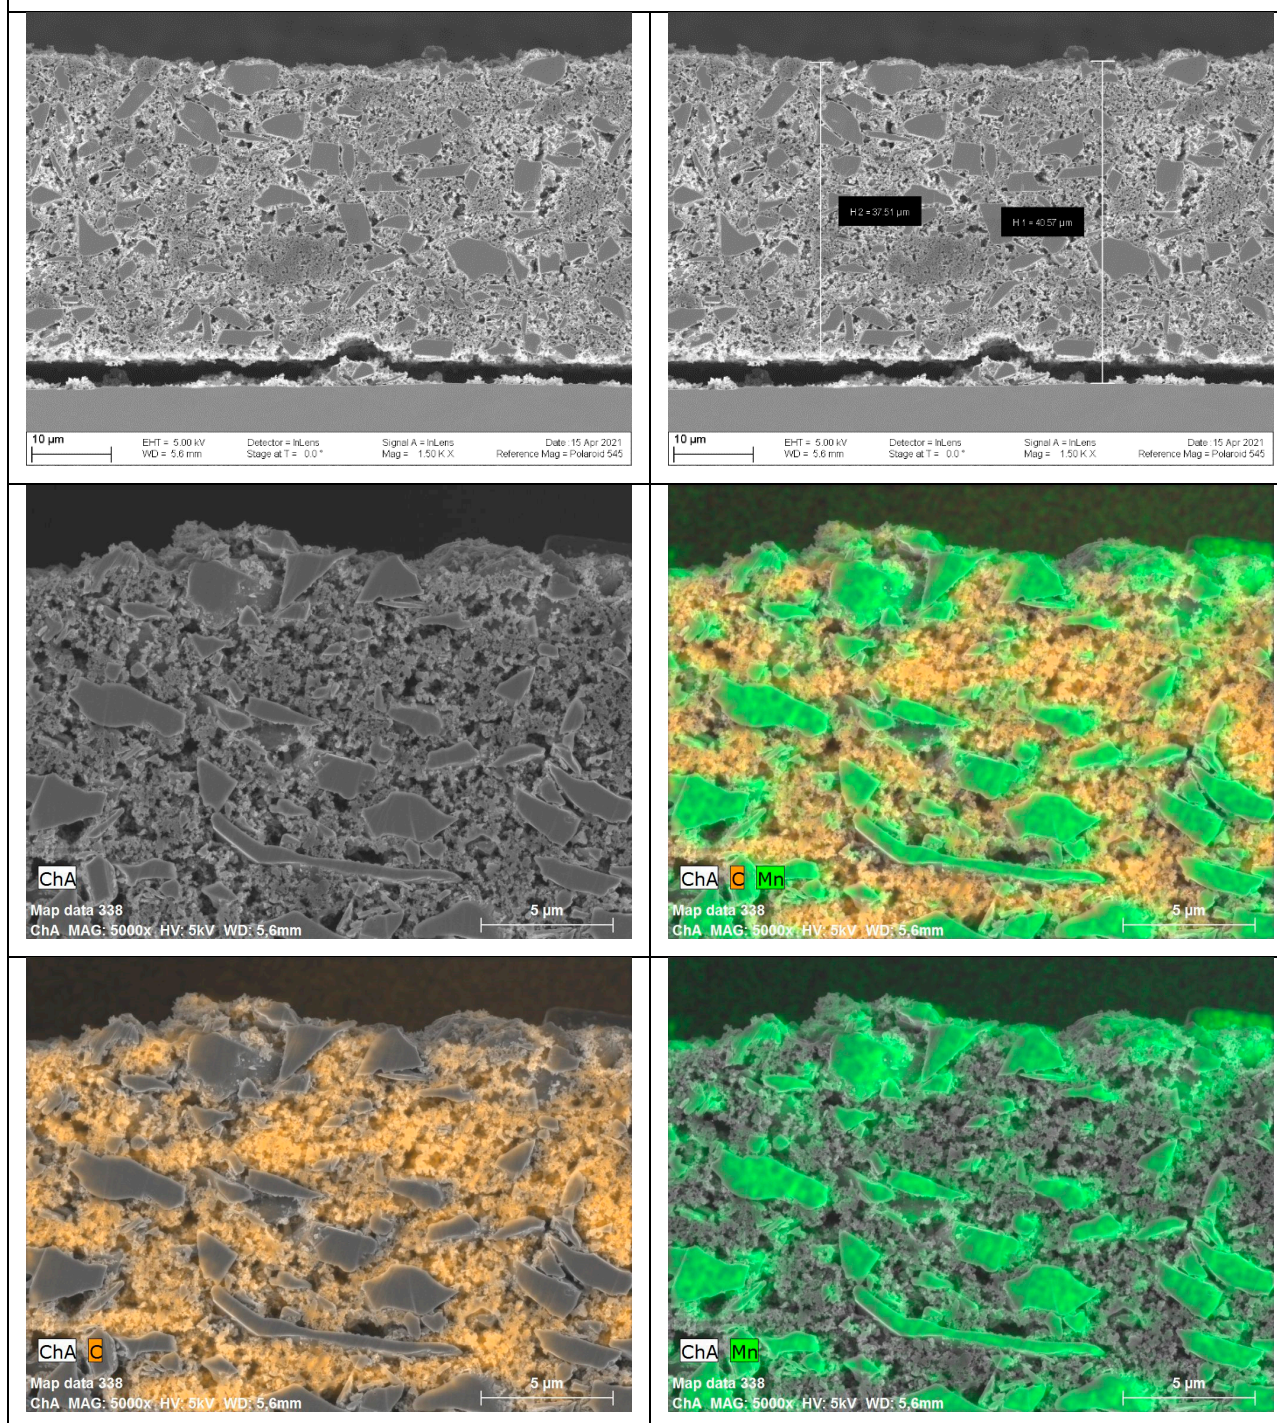

Figure S11: SEM+EDX images of the coating with aqueous LA133 (PAN-based) binder with the mixing ratio of 80/15/05 (AM/CB/BP, wt%) in pristine state. The electrode thickness is ~40 μm. (green coloured = MnO<sub>2</sub> particles, orange coloured = carbon black (CB)).

## Comparison

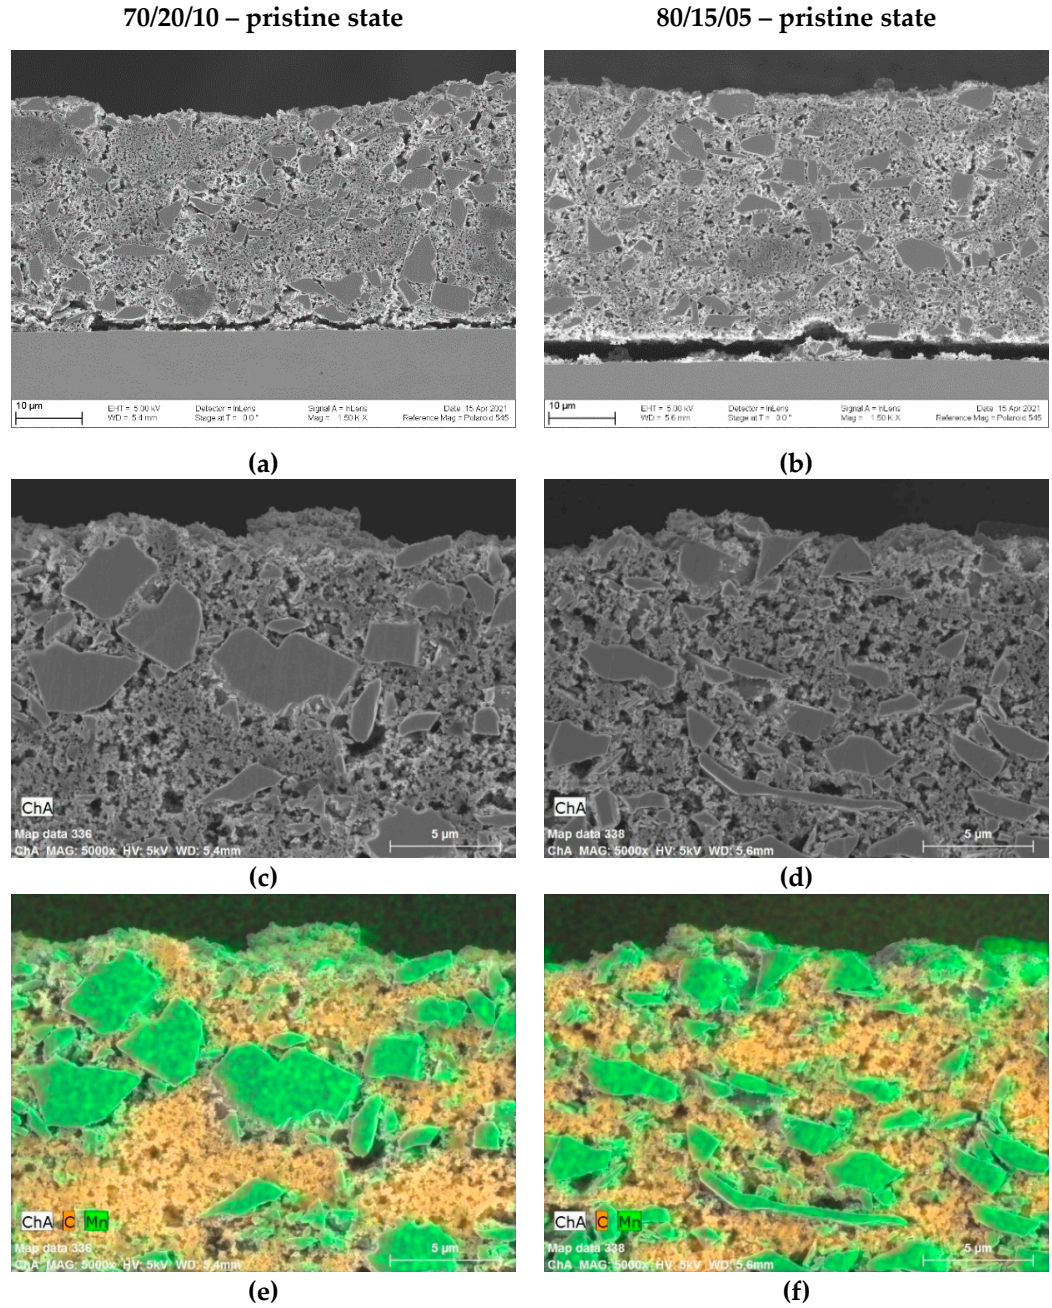

Figure S12: Comparison of the 70/20/10 and 80/15/05 binders in pristine state. For the 80/15/05 coating, smaller distances of the  $\text{MnO}_2$  active material particles (coloured green) and a more compact visual impression of the coating could be assumed, which could be referred to the lower CB content and the lower overall passive material (CB + BP) share (20 wt% instead of 30 wt% for the 70/20/10 coating).

S11. Potential curves: comparison of IR-drops (binder & mixing variation)

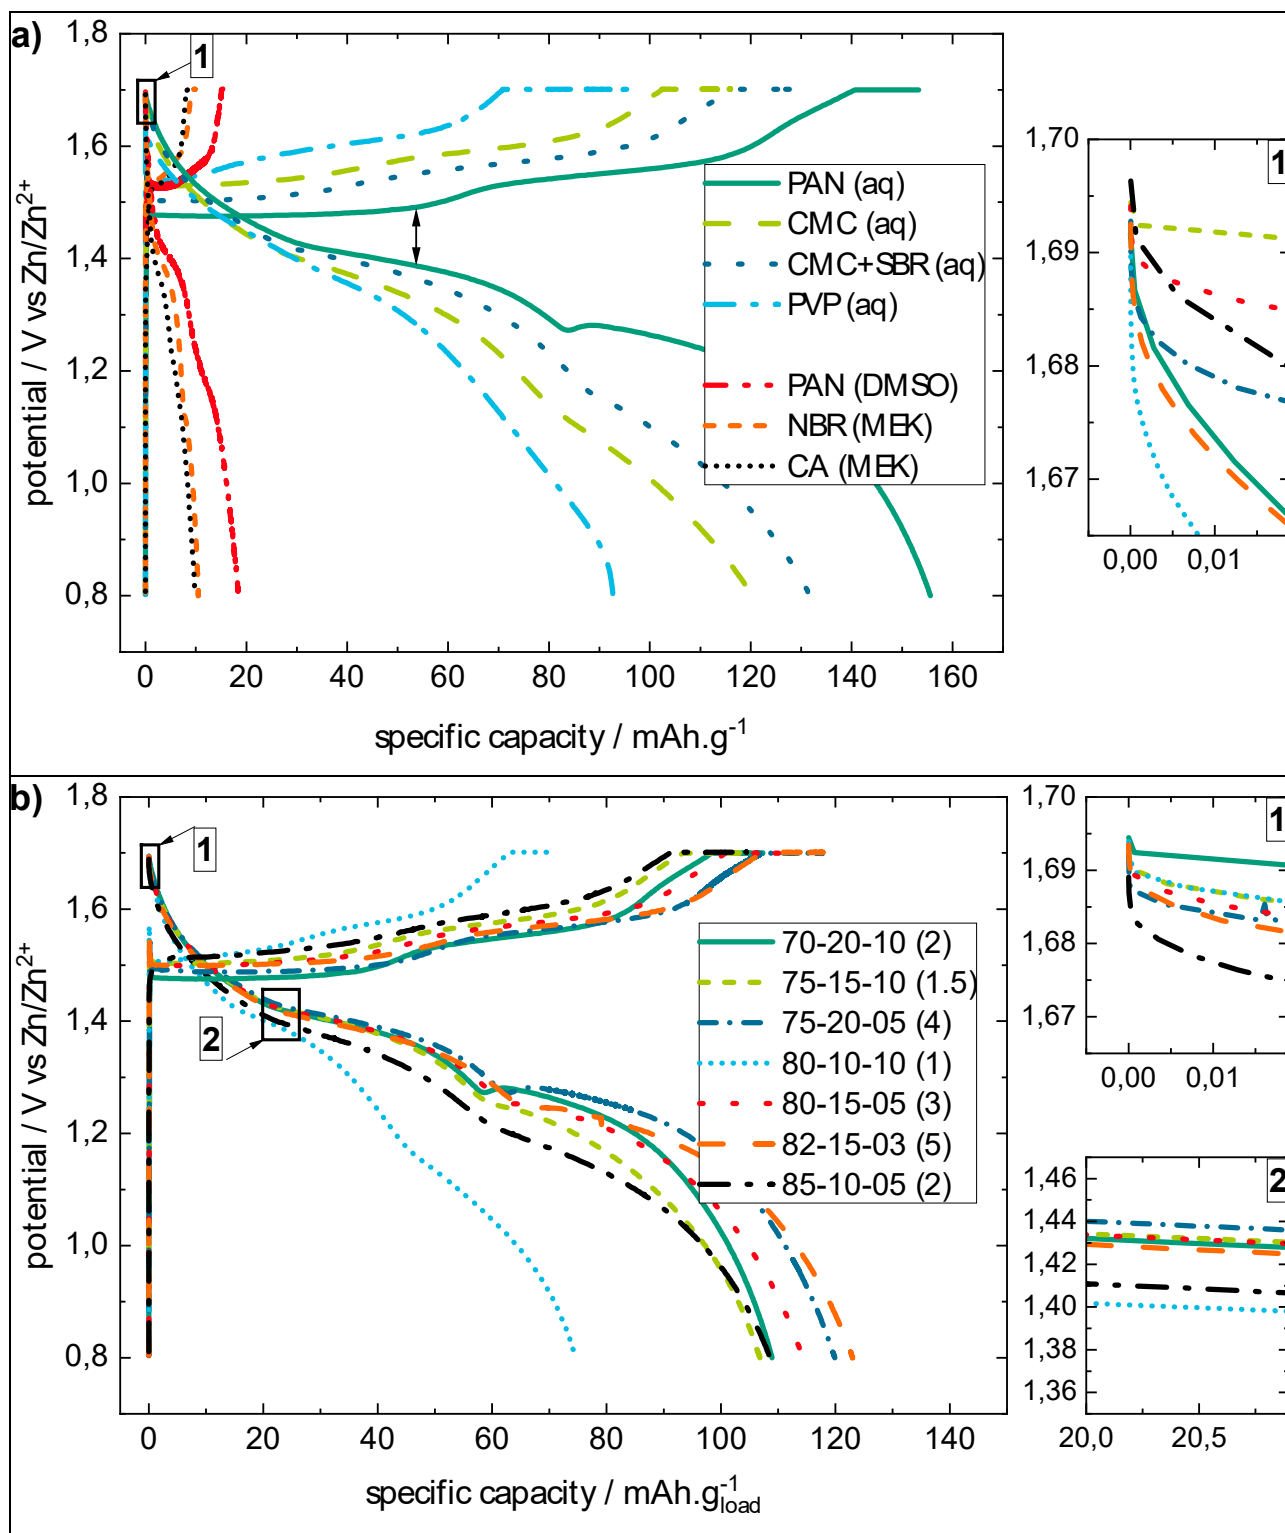

Figure S13: Overview over the charge/discharge curves of the 10<sup>th</sup> cycle (80 mA.g<sup>-1</sup>) of the RCT shown in Figure S4 for the binder variation (a) and mixing variation (b) with insets showing the IR drops directly after the switchover from charge to discharge (marker 1) and the first potential plateau during discharge (marker 2).

(a) Binder variation: The overview of the potential curves reveals differences of the potential plateau hysteresis between the charge/discharge step (s. arrow), which can be related to the inner resistance of the battery cell (including ohmic/charge transfer/diffusion resistance, for example). The initial IR drop after the switchover from charge to discharge (capacity ~0 mAh.g<sup>-1</sup>) could be an indicator for mainly the electrical (ohmic) resistance of the electrode coating (here: identical electrolyte, cell setup, cell casing, cables, battery tester etc), as the charge transfer/diffusion phenomena only start playing a role in the

course of the discharge. PAN (aq), for example, shows the smallest potential hysteresis between charge/discharge, which can be related to advantages in terms of the inner resistance, whereas CA (MEK) shows a high potential hysteresis indicating a high inner resistance of the battery cell.

- (b) Mixing variation: Again, the overview shows differences in terms of the potential hysteresis between the charge/discharge step and the IR-drops after the switchover from charge to discharge, which can reveal insights into the inner resistances of the coatings (here: again, identical electrolyte, cell setup, cell casing, cables, battery tester etc). The coating with the lowest CB/BP-ratio of 1 (s. brackets in the graph legend) and a low CB-content of 10 wt% (coating 8o-10-10, AM-CB-BP in wt%) shows the lowest potential plateau level during discharge and discharge capacity, which can be related to the inner resistance of the coating (ohmic/charge transfer/diffusion resistance). In general, there is a trend for coatings with a low CB-content of 10 wt% showing lower potential plateau levels (marker 2) and higher IR-drops after the switchover from charge to discharge (marker 1). In contrast, the higher the CB content of the coating, the higher the potential plateaus (marker 2).

## S12. Mechanical stress test (MST): explanation approach for the dissolution phenomena of the aqueous binder-based electrodes in DI-water/electrolyte

The electrolyte solution used in our study was 2 M  $\text{ZnSO}_4$  + 0.1 M  $\text{MnSO}_4$ . Therefore, only the main component  $\text{ZnSO}_4$  is considered as a simplification for the following discussion: The solubility of  $\text{ZnSO}_4$  in water is ~3.5 M [26], which can be determined using the solubility product equation (s. [27], for example). During the solvation of the zinc salt, a solvation shell around the ions is formed by the solvent water (hydration, s. [28]). As the herein used electrolytes are not saturated and have a salt concentration below the solubility of  $\text{ZnSO}_4$  (here: 2 M), there is still free solvation energy left [28]. Nevertheless, this solvation free energy is reduced by the already dissolved electrolyte salts, compared to the pure DI-water. If the electrode coating comes in contact to either pure DI-water or electrolyte solution as solvents, the binder component as a soluble component could basically dissolve in the solvent. Nevertheless, due to the difference in the solvation free energy of both the solvents, the solvation process is extremely retarded for the electrolyte solution in consequence to the predissolved ions and the reduced solvation free energy, compared to the DI-water. From our point of view, this is the explanation for the observation of the stability of the aqueous binder-based electrodes in electrolyte compared to the instability (dissolution) of these electrodes in pure DI-water.

## Literature

1. Chang, H.J.; Rodríguez-Pérez, I.A.; Fayette, M.; Canfield, N.L.; Pan, H.; Choi, D.; Li, X.; Reed, D. Effects of water-based binders on electrochemical performance of manganese dioxide cathode in mild aqueous zinc batteries. *Carbon Energy* **2020**, doi:10.1002/cey2.84.
2. Olbasa, B.W.; Fenta, F.W.; Chiu, S.-F.; Tsai, M.-C.; Huang, C.-J.; Jote, B.A.; Beyene, T.T.; Liao, Y.-F.; Wang, C.-H.; Su, W.-N.; et al. High-Rate and Long-Cycle Stability with a Dendrite-Free Zinc Anode in an Aqueous Zn-Ion Battery Using Concentrated Electrolytes. *ACS Appl. Energy Mater.* **2020**, *3*, 4499–4508, doi:10.1021/acsaem.0c00183.
3. Pan, H.; Ellis, J.; Li, X.; Nie, Z.; Chang, H.J.; Reed, D. Electrolyte Effect on the Electrochemical Performance of Mild Aqueous Zinc-Electrolytic Manganese Dioxide Batteries. *ACS Appl. Mater. Interfaces* **2019**, doi:10.1021/acsaami.9b09252.
4. Palaniyandy, N.; Kebede, M.A.; Raju, K.; Ozoemena, K.I.; Le Roux, L.; Mathe, M.K.; Jayaprakasam, R.  $\alpha$ - $\text{MnO}_2$  nanorod/onion-like carbon composite cathode material for aqueous zinc-ion battery. *Materials Chemistry and Physics* **2019**, *230*, 258–266, doi:10.1016/j.matchemphys.2019.03.069.

5. Hou, Z.; Dong, M.; Xiong, Y.; Zhang, X.; Ao, H.; Liu, M.; Zhu, Y.; Qian, Y. A High-Energy and Long-Life Aqueous Zn/Birnessite Battery via Reversible Water and Zn<sup>2+</sup> Coinsertion. *Small* **2020**, e2001228, doi:10.1002/smll.202001228.
6. Guo, X.; Li, J.; Jin, X.; Han, Y.; Lin, Y.; Lei, Z.; Wang, S.; Qin, L.; Jiao, S.; Cao, R. A Hollow-Structured Manganese Oxide Cathode for Stable Zn-MnO<sub>2</sub> Batteries. *Nanomaterials* **2018**, *8*, doi:10.3390/nano8050301.
7. Xu, D.; Li, B.; Wei, C.; He, Y.-B.; Du, H.; Chu, X.; Qin, X.; Yang, Q.-H.; Kang, F. Preparation and Characterization of MnO<sub>2</sub>/acid-treated CNT Nanocomposites for Energy Storage with Zinc Ions. *Electrochimica Acta* **2014**, *133*, 254–261, doi:10.1016/j.electacta.2014.04.001.
8. Bischoff, C.; Fitz, O.; Schiller, C.; Gentischer, H.; Biro, D.; Henning, H.-M. Investigating the Impact of Particle Size on the Performance and Internal Resistance of Aqueous Zinc Ion Batteries with a Manganese Sesquioxide Cathode. *MDPI Batteries* **2018**, *4*, 44, doi:10.3390/batteries4030044.
9. Chamoun, M.; Brant, W.R.; Tai, C.-W.; Karlsson, G.; Noréus, D. Rechargeability of aqueous sulfate Zn/MnO<sub>2</sub> batteries enhanced by accessible Mn<sup>2+</sup> ions. *Energy Storage Materials* **2018**, *15*, 351–360, doi:10.1016/j.ensm.2018.06.019.
10. Zhang, N.; Cheng, F.; Liu, J.; Wang, L.; Long, X.; Liu, X.; Li, F.; Chen, J. Rechargeable aqueous zinc-manganese dioxide batteries with high energy and power densities. *Nat. Commun.* **2017**, *8*, 405, doi:10.1038/s41467-017-00467-x.
11. Jiang, B.; Xu, C.; Wu, C.; Dong, L.; Li, J.; Kang, F. Manganese Sesquioxide as Cathode Material for Multivalent Zinc Ion Battery with High Capacity and Long Cycle Life. *Electrochimica Acta* **2017**, *229*, 422–428, doi:10.1016/j.electacta.2017.01.163.
12. Pan, H.; Shao, Y.; Yan, P.; Cheng, Y.; Han, K.S.; Nie, Z.; Wang, C.; Yang, J.; Li, X.; Bhattacharya, P.; et al. Reversible aqueous zinc/manganese oxide energy storage from conversion reactions. *Nat. Energy* **2016**, *1*, 16039, doi:10.1038/nenergy.2016.39.
13. Islam, S.; Alfaruqi, M.H.; Mathew, V.; Song, J.; Kim, S.; Kim, S.; Jo, J.; Baboo, J.P.; Pham, D.T.; Putro, D.Y.; et al. Facile synthesis and the exploration of the zinc storage mechanism of  $\beta$ -MnO<sub>2</sub> nanorods with exposed (101) planes as a novel cathode material for high performance eco-friendly zinc-ion batteries. *J. Mater. Chem. A* **2017**, *5*, 23299–23309, doi:10.1039/C7TA07170A.
14. Poyraz, A.S.; Laughlin, J.; Zec, Z. Improving the cycle life of cryptomelane type manganese dioxides in aqueous rechargeable zinc ion batteries: The effect of electrolyte concentration. *Electrochimica Acta* **2019**, *305*, 423–432, doi:10.1016/j.electacta.2019.03.093.
15. Huang, J.; Wang, Z.; Hou, M.; Dong, X.; Liu, Y.; Wang, Y.; Xia, Y. Polyaniline-intercalated manganese dioxide nanolayers as a high-performance cathode material for an aqueous zinc-ion battery. *Nat. Commun.* **2018**, *9*, 2906, doi:10.1038/s41467-018-04949-4.
16. Zeng, X.; Liu, J.; Mao, J.; Hao, J.; Wang, Z.; Zhou, S.; Ling, C.D.; Guo, Z. Toward a Reversible Mn<sub>4</sub><sup>+</sup>/Mn<sub>2</sub><sup>+</sup> Redox Reaction and Dendrite-Free Zn Anode in Near-Neutral Aqueous Zn/MnO<sub>2</sub> Batteries via Salt Anion Chemistry. *Adv. Energy Mater.* **2020**, *10*, 1904163, doi:10.1002/aenm.201904163.
17. Guo, X.; Zhou, J.; Bai, C.; Li, X.; Fang, G.; Liang, S. Zn/MnO<sub>2</sub> battery chemistry with dissolution-deposition mechanism. *Materials Today Energy* **2020**, *16*, 100396, doi:10.1016/j.mtener.2020.100396.
18. Sun, W.; Wang, F.; Hou, S.; Yang, C.; Fan, X.; Ma, Z.; Gao, T.; Han, F.; Hu, R.; Zhu, M.; et al. Zn/MnO<sub>2</sub> Battery Chemistry With H<sup>+</sup> and Zn<sup>2+</sup> Coinsertion. *J. Am. Chem. Soc.* **2017**, *139*, 9775–9778, doi:10.1021/jacs.7b04471.
19. Xu, C.; Li, B.; Du, H.; Kang, F. Energetic zinc ion chemistry: the rechargeable zinc ion battery. *Angew. Chem. Int. Ed Engl.* **2012**, *51*, 933–935, doi:10.1002/anie.201106307.

20. Lee, B.; Yoon, C.S.; Lee, H.R.; Chung, K.Y.; Cho, B.W.; Oh, S.H. Electrochemically-induced reversible transition from the tunneled to layered polymorphs of manganese dioxide. *Sci. Rep.* **2014**, *4*, 6066, doi:10.1038/srep06066.
21. Lee, B.; Lee, H.R.; Kim, H.; Chung, K.Y.; Cho, B.W.; Oh, S.H. Elucidating the intercalation mechanism of zinc ions into  $\alpha$ -MnO<sub>2</sub> for rechargeable zinc batteries. *Chem. Commun. (Camb)* **2015**, *51*, 9265–9268, doi:10.1039/C5CC02585K.
22. Wu, B.; Zhang, G.; Yan, M.; Xiong, T.; He, P.; He, L.; Xu, X.; Mai, L. Graphene Scroll-Coated  $\alpha$ -MnO<sub>2</sub> Nanowires as High-Performance Cathode Materials for Aqueous Zn-Ion Battery. *Small* **2018**, *14*, e1703850, doi:10.1002/smll.201703850.
23. Alfaruqi, M.H.; Mathew, V.; Gim, J.; Kim, S.; Song, J.; Baboo, J.P.; Choi, S.H.; Kim, J. Electrochemically Induced Structural Transformation in a  $\gamma$ -MnO<sub>2</sub> Cathode of a High Capacity Zinc-Ion Battery System. *Chem. Mater.* **2015**, *27*, 3609–3620, doi:10.1021/cm504717p.
24. Alfaruqi, M.H.; Gim, J.; Kim, S.; Song, J.; Pham, D.T.; Jo, J.; Xiu, Z.; Mathew, V.; Kim, J. A layered  $\delta$ -MnO<sub>2</sub> nanoflake cathode with high zinc-storage capacities for eco-friendly battery applications. *Electrochemistry Communications* **2015**, *60*, 121–125, doi:10.1016/j.elecom.2015.08.019.
25. Han, S.-D.; Kim, S.; Li, D.; Petkov, V.; Yoo, H.D.; Phillips, P.J.; Wang, H.; Kim, J.J.; More, K.L.; Key, B.; et al. Mechanism of Zn Insertion into Nanostructured  $\delta$ -MnO<sub>2</sub> : A Nonaqueous Rechargeable Zn Metal Battery. *Chem. Mater.* **2017**, *29*, 4874–4884, doi:10.1021/acs.chemmater.7b00852.
26. *CRC Handbook of Chemistry and Physics: A ready-reference book of chemical and physical data*; Haynes, W.M., Ed., 97th edition; CRC Press: Boca Raton, London, New York, 2017, ISBN 9781498754286.
27. Oxtoby, D.W.; Gillis, H.P.; Campion, A. *Principles of modern chemistry*; Recording for the Blind & Dyslexic: Princeton, N.J., 2007, ISBN 978-0-534-49366-0.
28. Bard, A.J.; Inzelt, G.; Scholz, F. *Electrochemical Dictionary*, 2nd ed. 2013; Springer: Berlin, Heidelberg, 2012, ISBN 9783642295515.
